*Naked mole-rat ASIC3 is proton insensitive*

Naked mole-rat acid-sensing ion channel 3 forms non-functional homomers, but functional heteromers

**Laura-Nadine Schuhmacher<sup>1,2</sup>, Shyam Srivats<sup>1,3</sup> Gerard Callejo<sup>1</sup> and Ewan St. John Smith<sup>1\*</sup>**

<sup>1</sup>Department of Pharmacology, University of Cambridge, Tennis Court Road, Cambridge, CB2 1PD, United Kingdom

<sup>2</sup>Current address: Department of Cell & Developmental Biology, University College London, Gower Street, London, WC1E 6BT, United Kingdom

<sup>3</sup>Cero Therapeutics, Oyster Point Boulevard, South San Francisco, California 94080, USA

Running title: *Naked mole-rat ASIC3 is proton insensitive*

To whom correspondence should be addressed: Ewan St. John Smith, Department of Pharmacology, University of Cambridge, Tennis Court Road, Cambridge, CB2 1PD, United Kingdom, Tel.: +44 1223 334048; Fax: +44 1223 334100; E-mail: [es336@cam.ac.uk](mailto:es336@cam.ac.uk)

Keywords: Acid sensing ion channel (ASIC), pain, ion channel, neuron, neurophysiology

---

## ABSTRACT

Acid-sensing ion channels (ASICs) form both homotrimeric and heterotrimeric ion channels that are activated by extracellular protons and are involved in a wide range of physiological and pathophysiological processes, including pain and anxiety. The ASIC3 subunit has been shown to be of particular importance in the peripheral nervous system with pharmacological and genetic manipulations demonstrating a role in pain. Naked mole-rats are insensitive to acid as a noxious stimulus and show diminished avoidance to acidic fumes, ammonia and carbon dioxide. Here we clone naked mole-rat ASIC3 (nmrASIC3) and demonstrate that although it traffics to the plasma membrane it is insensitive to protons. However, in line with previous demonstration of ASIC3 mRNA expression in dorsal root ganglia (DRG) neurons, we demonstrate that the ASIC3 antagonist APETx2 reversibly inhibits ASIC-like currents in naked mole-rat DRG neurons. We further show that like the proton-insensitive ASIC2b and ASIC4, nmrASIC3 forms functional heteromers with other ASIC subunits. An amino acid alignment of ASIC3s identified sequence differences that might underlie the proton-insensitivity of nmrASIC3, however, mutating rat ASIC3 (rASIC3) in line with these differences only produced minor differences in channel function and replacing nmrASIC3 sequence with that of rASIC3 did not produce a proton-sensitive ion channel.

## Introduction

Acid-sensing ion channels (ASICs) are part of the epithelial sodium channel (ENaC)/degenerin (DEG) superfamily of ion channels and are implicated in a diverse range of physiological and pathophysiological processes, ranging from learning and memory to mechanosensation and pain (1). In mammals, there are 4 ASIC encoding genes, which generate 6 distinct ASIC subunits due to splice variants in the *ACCN2* and *ACCN1* genes producing a and b variants of the ASIC1 and ASIC2 subunits respectively: ASIC1a, ASIC1b, ASIC2a, ASIC2b, ASIC3 and ASIC4. The crystal structure of ASIC1 demonstrated that ASICs form trimeric ion channels (2) and although evidence exists for the formation of ASIC/ENaC heteromers (3, 4), it is largely thought that functional ASICs are the result of either homo- or heterotrimeric arrangement of ASIC subunits.

Unlike transient receptor potential vanilloid 1 (TRPV1) that produces a sustained inward current in response to extracellular protons (5), ASICs produce a transient inward current (6). However, being trimeric, the subunit configuration dictates the biophysical characteristics, such as the proton sensitivity for activation, the inactivation time constant and the magnitude of the sustained current in subunit configurations where the current does not completely inactivate in the continued presence of agonist (7). Moreover, the sensitivity to different antagonists is also affected by subunit configuration. For example, the ASIC3 antagonist

APETx2 inhibits ASIC3 homomers, as well as heteromers of ASIC3 with ASIC1a, ASIC1b and ASIC2b, but does not inhibit ASIC2a+ASIC3 heteromers (8).

Of the 6 ASIC subunits, neither ASIC2b (9) nor ASIC4 (10, 11) form functional homomers, but they are able to form functional heteromers and modulate channel function (7, 9, 12), as can ASIC subunits that have been mutated to make them insensitive to protons as homomers (13, 14). The crystal structure of chicken ASIC1 (cASIC1) identified an acidic pocket region containing three carboxylate pairs (D238–D350, E239–D346 and E220–D408; cASIC1 numbering), which was suggested to be the primary site for proton sensing by ASICs (2). However, ASIC2a lacks D350 and is still functional, whereas ASIC2b also only lacks the D350 carboxylate of the acidic pocket and is not activated by protons (9, 13), results which suggest that regions outside of the acidic pocket must be important for proton activation of ASICs. Indeed, we and others have identified a range of residues on ASIC1a and ASIC2a that when mutated alter proton sensitivity (13–17) and more recently we have shown that the first 87 amino acids of the extracellular domain of rat ASIC2a are required for its proton sensitivity (18).

Understanding the structure-function of ASIC3 is of particular interest because there is substantial evidence supporting involvement of ASIC3 in pain (19–25), as well itch (26), mechanosensation (19, 27) and anxiety (28). Although ASIC3 expression was initially thought to be restricted to the peripheral nervous system (and hence its original name, dorsal root ganglia acid-sensing ion channel, DRASIC (29)), we and others have demonstrated that ASIC3 is also expressed in both the spinal cord and numerous brain regions (30, 31), which makes it even more important to understand how ASIC3 functions because any potential drug that targets ASIC3 for the treatment of pain may also produce side effects with the central nervous system.

Here we investigated the function of ASIC3 cloned from the naked mole-rat, a species that we have previously shown to produce no behavioral response to acid as a noxious stimulus (32). This behavioral indifference to acid is not due to a lack of ASIC-like or TRPV1-like proton-gated currents in sensory neurons, but rather due to an amino acid variation in the voltage-gated Na<sup>+</sup> channel NaV1.7 that confers enhanced acid block, such that acid acts like an anesthetic, rather than

### *Naked mole-rat ASIC3 is proton insensitive*

activator of naked mole-rat sensory neurons (33). This is likely a result of adaptation to living in a hypercapnic environment that may induce tissue acidosis (34) and indeed naked mole-rats also show reduced avoidance of ammonia and acid fumes (35, 36), as well as decreased aversion to CO<sub>2</sub>, absence of CO<sub>2</sub>-induced pulmonary edema and enhanced ability to buffer against CO<sub>2</sub>-induced systemic acidosis (37). Although naked mole-rats can more efficiently buffer CO<sub>2</sub>, our previous data regarding the inability of acid to evoke action potentials in an ex vivo preparation (32) that arises from an amino acid variation in NaV1.7 (33) demonstrates that there are likely multiple adaptations to living in a hypercapnic environment. We recently compared ASIC expression between mice and naked mole-rats, finding that whereas ASIC4 is highly abundant in mouse tissues it is the most lowly expressed ASIC transcript in naked mole-rat tissues; the expression pattern of ASIC3 was similar between species (30). At a functional level, we have previously shown that naked mole-rat ASIC1a, ASIC1b and TRPV1 are largely indistinguishable from the mouse orthologs (33, 38) and here we set out to explore the function of naked mole-rat ASIC3 considering its importance to a physiological and pathophysiological processes.

### **Results**

#### *Naked mole-rat ASIC3 is insensitive to protons*

Primers for cloning mouse ASIC3 (mASIC3) and naked mole-rat ASIC3 (nmrASIC3) were designed based upon the published genome sequences and constructs were made using pIRES2-EGFP or pTarget vectors; rat ASIC3 (rASIC3 in pTracer) was a kind gift from G. Lewin. All constructs were expressed in Chinese hamster ovary (CHO) cells that lack endogenous ASICs (13), and whole-cell patch-clamp electrophysiology was used to measure responses to protons (pH 4.0). Whereas mASIC3 and rASIC3 robustly responded to protons with a stereotypical transient ASIC-like current (mASIC3:  $70 \pm 16$  pA/pF,  $n = 19$ , Fig. 1A, and rASIC3:  $424 \pm 62$  pA/pF,  $n = 10$ , Fig. 1B), nmrASIC3 failed to respond with an ASIC-like response to protons, even using a pH 3.0 stimulus, but rather produced a very small, non-inactivating response, similar to that which we have observed previously in non-transfected CHO cells (13) and in CHO cells transfected with the proton-insensitive ASIC2b (18) (pH 4.0,  $n = 16$  and pH 3.0,  $n = 10$ , 4 separate transfections, Fig. 1C); a

### *Naked mole-rat ASIC3 is proton insensitive*

summary of all data is given in Table 1. One possibility is that nmrASIC3 is retained in the endoplasmic reticulum, as has been proposed for the proton-insensitive mASIC2b, which only gets to the plasma membrane when coexpressed with the proton-sensitive ASIC2a (39). However, using a biotinylation assay to determine plasma membrane expression of mASIC3 and nmrASIC3, transfected either alone, or with rASIC2a, we observed that nmrASIC3 traffics to the plasma membrane, regardless of whether it is transfected alone or with rASIC2a, just like mASIC3 (Fig. 1D). Therefore, the insensitivity of nmrASIC3 to protons cannot be explained by a lack of membrane expression.

#### *nmrASIC3 is functional in dorsal root ganglion neurons*

We have previously demonstrated that naked mole-rat dorsal root ganglion (DRG) neurons produce ASIC-like currents in response to acid (33) and that these neurons express nmrASIC3 mRNA (30, 33) and thus we used APETx2, an inhibitor ASIC3-containing ASICs, to determine if nmrASIC3 contributes to the acid-sensitivity of these neurons. A pH 5.0 stimulus evoked two types of inward current in naked mole-rat DRG neurons: rapidly-inactivating, ASIC-like currents and sustained, TRPV1-like currents (Fig. 2A and B). Exposure to 2  $\mu$ M APETx2 for 30 seconds caused a significant decrease in the amplitude of the ASIC-like responses evoked by a second pH 5.0 stimulus (61  $\pm$  16 pA/pF vs. 33  $\pm$  10 pA/pF, n = 8, p  $\leq$  0.05, Fig. 2A and C), but had no effect upon TRPV1-like responses 5  $\pm$  2 pA/pF vs. 4  $\pm$  1 pA/pF, n = 14, Fig. 2B and C); the inhibition of ASIC-like responses was reversible (47  $\pm$  11 pA/pF, p  $\leq$  0.05). Considering that APETx2 is selective for ASIC3 homomers and most ASIC3 heteromers (8), and that nmrASIC3 does not form proton-sensitive homomers (Fig. 1), these results suggest that nmrASIC3 can form proton-sensitive heteromers with other ASIC subunits, much like the other proton-insensitive ASIC subunits ASIC2b and ASIC4 (9, 12).

#### *nmrASIC3 forms functional ASIC heteromers with other ASIC subunits*

To determine if nmrASIC3 can form proton-sensitive heteromers with other ASIC subunits as DRG neuron data would suggest, we cotransfected either nmrASIC3 or mASIC3 with nmrASIC1b and compared the properties of currents recorded

from these cotransfected cells with those only transfected with either mASIC3 or nmrASIC1b. Using a pH 4.0 stimulus, currents recorded from cells transfected with mASIC3 had a peak current density of 87  $\pm$  38 pA/pF (n = 8), an inactivation time constant of 251  $\pm$  36 msec (n = 5) and  $I_{\text{sus}}/I_{\text{peak}}$ , the sustained current as a percentage of the peak current, was 44  $\pm$  8 % (n = 5, Fig. 3A-D). Currents recorded from cells transfected with nmrASIC1b had a peak current density of 20  $\pm$  3 pA/pF, an inactivation time constant of 118  $\pm$  7 msec (n = 21) and  $I_{\text{sus}}/I_{\text{peak}}$  was 12  $\pm$  2 % (n = 17, Fig. 3A-D). In cells cotransfected with nmrASIC1b and nmrASIC3, currents were recorded in all instances suggesting that nmrASIC3 does not have a dominant negative effect. Properties of nmrASIC3+nmrASIC1b currents were as follows: peak current density, 67  $\pm$  13 pA/pF (n = 18, p  $\leq$  0.01 vs. mASIC3+nmrASIC1b), inactivation time constant, 125  $\pm$  7 msec (n = 17) and  $I_{\text{sus}}/I_{\text{peak}}$  was 34  $\pm$  5 % (n = 18, Fig. 3A-D). Similar currents were observed in cells expressing mASIC3+nmrASIC1b: peak current density, 193  $\pm$  48 pA/pF (n = 14), inactivation time constant, 93  $\pm$  5 msec (n = 14) and  $I_{\text{sus}}/I_{\text{peak}}$  31  $\pm$  4 % (n = 15, Fig. 3A-D). Importantly, for both nmrASIC3+nmrASIC1b and mASIC3+nmrASIC1b currents, the  $I_{\text{sus}}/I_{\text{peak}}$  was significantly greater than that of nmrASIC1b homomers (p  $\leq$  0.01 and p  $\leq$  0.05 respectively, Fig. 3D) and that of mASIC3 homomers (p  $\leq$  0.01 and p  $\leq$  0.05 respectively, Fig. 3D), which suggests that both nmrASIC3 and mASIC3 form heteromers with nmrASIC1b to produce currents with a substantial sustained component. Although the large sustained component measured in cells expressing mASIC3 and nmrASIC1b could be the result of measuring a mixture of mASIC3 homomeric currents (large  $I_{\text{sus}}/I_{\text{peak}}$ ) and nmrASIC1b homomers (small  $I_{\text{sus}}/I_{\text{peak}}$ ) this cannot explain the large  $I_{\text{sus}}/I_{\text{peak}}$  measured in cells expressing nmrASIC3 and nmrASIC1b because nmrASIC3 does not form proton-sensitive homomers and thus it is likely that ASIC3 and ASIC1b form heteromers that have a substantial  $I_{\text{sus}}/I_{\text{peak}}$  as has been shown by others for rASIC3+rASIC1b (7). A second piece of evidence suggesting that nmrASIC3 can form functional ASIC heteromers is that pH-response curves show that the effective concentration 50 (EC<sub>50</sub>) for mASIC3+nmrASIC1b heteromers was not significantly different from that of

### *Naked mole-rat ASIC3 is proton insensitive*

nmrASIC3+nmrASIC1b (pH  $5.57 \pm 0.07$ ,  $n = 9$ , vs. pH  $5.61 \pm 0.05$ ,  $n = 12$ ,  $p = 0.69$ ), but that both of these were significantly different from the  $EC_{50}$  of either mASIC3 or nmrASIC1b homomers (mASIC3, pH  $6.0 \pm 0.08$ ,  $n = 10$  and nmrASIC1b, pH  $6.09 \pm 0.05$ ,  $n = 10$ ,  $p \leq 0.001$  Fig. 3E).

We also investigated the ability of mASIC3 and nmrASIC3 to form heteromers with rASIC2a and found that as shown previously (7, 40) coexpression of mASIC3 and rASIC2a resulted in currents with an  $I_{\text{sus}}/I_{\text{peak}}$  that was significantly greater than that produced by either mASIC3 or rASIC2a homomers (mASIC3+rASIC2a:  $141 \pm 25$ ,  $n = 13$  vs. mASIC3:  $61 \pm 5\%$ ,  $n = 16$ ,  $p < 0.01$  and rASIC2a  $29 \pm 6\%$ ,  $n = 8$ ,  $p < 0.001$  Fig. 4A and D). By contrast, cells expressing nmrASIC3 and rASIC2a produced currents that did not produce a large  $I_{\text{sus}}/I_{\text{peak}}$  (Fig. 4A and D) and appeared largely indistinguishable from rASIC2a homomers; the lack of a large sustained current in cells expressing nmrASIC3+rASIC2a in response to protons is not necessarily a sign that heteromers are not formed because rASIC2+rASIC3 heteromers have been reported to have an  $I_{\text{sus}}/I_{\text{peak}}$  of  $\sim 30\%$  (25), not to dissimilar to the  $19 \pm 4\%$  observed here. Moreover, a small, but significant difference in the inactivation time constant was observed suggesting that heteromers may be formed: nmrASIC3+rASIC2a heteromers inactivated significantly more slowly than mASIC3+rASIC2a heteromers and homomers of either rASIC2 or mASIC3 (nmrASIC3+rASIC2a,  $1637 \pm 62$  msec,  $n = 9$  vs. mASIC3+rASIC2a,  $80.40 \pm 10.10$  msec,  $n = 4$ ,  $p \leq 0.001$ , vs. rASIC2a,  $1220 \pm 108$  msec,  $n = 17$ ,  $p < 0.05$  and vs. mASIC3,  $210.80 \pm 14.44$  msec,  $n = 16$ ,  $p \leq 0.001$  Fig. 4C). Currents mediated by nmrASIC3+rASIC2a were of a significantly larger magnitude than those mediated by mASIC3+rASIC2a (nmrASIC3+rASIC2a  $455 \pm 217$  pA/pF,  $n = 10$ , vs. mASIC3+rASIC2a,  $129 \pm 23$  pA/pF,  $n = 13$ ,  $p \leq 0.05$ , Fig. 4B), but were indistinguishable from those mediated by rASIC2a alone (rASIC2a,  $421 \pm 58$ ,  $n = 50$ , Fig. 4B). Examination of pH-response curves showed that both mASIC3+rASIC2a and nmrASIC3+rASIC2a produced currents that were significantly less sensitive to protons than mASIC3, but not significantly different from each other ( $EC_{50}$ s: mASIC3+rASIC2a, pH  $4.48 \pm 0.09$ ,  $n = 17$ , vs. nmrASIC3+rASIC2a, pH  $4.27 \pm 0.1$ ,  $n = 11$ ,  $p = 0.068$ , and vs. mASIC3, pH  $6.0 \pm 0.08$ ,  $n = 10$ ,  $p \leq$

$0.001$ , Fig. 4E), and these were also indistinguishable from that of rASIC2a ( $EC_{50}$ : rASIC2a, pH  $4.43 \pm 0.05$ ,  $n = 14$ ,  $p = 0.6$ ). In summary, based upon biophysical characterization, nmrASIC3 forms functional heteromers with nmrASIC1b (Fig. 3), but the evidence is less clear for heteromeric formation with rASIC2a (Fig. 4) although these two subunits are both present at the plasma membrane when cotransfected (Fig. 1G) and the fact that ASIC-like currents are sensitive to inhibition by APETx2 in DRG neurons from naked mole-rats (Fig. 2) strongly supports the premise that although nmrASIC3 produces proton-insensitive homomers it can form functional heteromers *in vivo*.

### *Amino acid variations specific to nmrASIC3 do not account for homomeric proton-insensitivity*

To determine the molecular basis for proton-insensitivity of nmrASIC3, we aligned the nmrASIC3 amino acid sequence with that of 9 other species (Fig. 5A-C), which firstly identified that nmrASIC3 is missing the first methionine of the protein sequence, having instead a methionine at position 7 (Fig. 5A). We thus created a version of mASIC3 lacking the initial ATG and further mutated the position 7 leucine for methionine (L7M), termed mASIC3-ATG, and an nmrASIC3 with an added methionine at position 1 and an M7L mutation termed nmrASIC3+ATG. mASIC3-ATG responded to low pH and the  $EC_{50}$  was  $5.96 \pm 0.09$  ( $n = 14$ ), not significantly different to that of wild-type mASIC3 ( $p = 0.74$ , Fig. 5D). By contrast, nmrASIC3+ATG, like wild-type nmrASIC3, did not respond to acid. Variation in the initial 7 amino acids of nmrASIC3 cannot therefore explain its proton insensitivity.

A second difference exclusive to nmrASIC3 in the comparison made was replacement of alanine at position 62 with glutamate (A62E, Fig. 5B), a residue likely within transmembrane domain 1, but close to the start of the extracellular domain (2). Because rASIC3 produced larger currents than mASIC3, we used this construct from this point onwards to determine if mutations altered pH sensitivity. A pH 4.0 stimulus produced inward currents of a similar amplitude in cells expressing either rASIC3A62E or rASIC3 (rASIC3A62E:  $705 \pm 219$  pA/pF,  $n = 7$  and rASIC3:  $499 \pm 145$ ,  $n = 10$ ), but the pH-response curve was shifted to the right such that rASIC3A62E was found to be less sensitive to protons (rASIC3A62E: pH  $5.98 \pm 0.1$ ,



### *Naked mole-rat ASIC3 is proton insensitive*

$n = 6$  and rASIC3:  $6.38 \pm 0.08$ ,  $n = 13$ ,  $p \leq 0.01$ , Fig. 5E) and currents inactivated significantly more rapidly (rASIC3A62E:  $343 \pm 47$  msec,  $n = 13$  vs. rASIC3:  $580 \pm 33$  msec,  $n = 5$ ,  $p \leq 0.001$ ).

A third amino acid variation was identified at residue 102, a conserved arginine being replaced in both the naked mole-rat and Damaraland mole-rat with histidine (Fig. 5C) and thus rASIC3A62E was further mutated to produce rASIC3A62ER102H. The pH-response curve for the double mutant rASIC3A62ER102H was not significantly different to that of rASIC3 (pH  $6.15 \pm 0.08$ ,  $n = 7$ ,  $p = 0.073$ , Fig. 5E). As for rASIC3A62E, currents mediated by rASIC3A62ER102H inactivated significantly faster than wild type rASIC3 (rASIC3A62ER102H,  $191 \pm 14$  msec,  $n = 8$ ,  $p < 0.001$ ). Thus it would appear that neither A62 nor R102 are of crucial importance in proton activation of ASIC3 and indeed when expressed in CHO cells neither nmrASIC3E62A nor nmrASIC3H102R resulted in the rescuing of nmrASIC3 proton-sensitivity.

### **Discussion**

Sensitivity to acid as a noxious stimulus is largely conserved throughout the animal Kingdom (41), but the naked mole-rat is behavioral insensitive to acid (32) due to a variation in NaV1.7, which results in acid anesthetizing, rather than activating, naked mole-rat sensory neurons (33). Moreover, naked mole-rats show behavioral indifference to both ammonia and acid fumes (35, 36), as well as CO<sub>2</sub> (37) at levels producing avoidance in mice. All of these findings demonstrate likely adaptations to having evolved in a subterranean, hypoxic/hypercapnic environment (42, 43). Here we undertook to investigate the properties of nmrASIC3 because evidence supports a role for ASIC3 in a wide variety of situations, including: pain (19–23), as well itch (26), mechanosensation (19, 27) and anxiety (28). Although nmrASIC3 displays a similar expression profile to mASIC3 (30), we show here that it is insensitive to protons when expressed in CHO cells, even though it traffics to the plasma membrane. Considering the 82.7% identity with mASIC3 and 81.6% rASIC3 at the amino acid level, including 95% similarity of the EC domain (EMBOSS matcher algorithm) (44), this finding was unexpected. Much like ASIC2b and ASIC4, which are also insensitive to protons (9, 12), we have produced

pharmacological evidence that nmrASIC3 contributes to heteromeric ASIC formation in DRG neurons, such that the ASIC3 subunit containing antagonist APETx2 reversibly inhibits ASIC-like currents, but has no effect on TRPV1-like currents, recorded from naked mole-rat DRG neurons. It has been well characterized that although homomeric ASIC currents can occur in both peripheral and central neurons (20, 45), it is perhaps more common for ASICs to form heteromers (20, 46) and variation of ASIC subunit configuration has a significant effect upon the sensitivity of channels to protons, their inactivation time constants, and sensitivity to different pharmacological agents (7, 8, 47, 48). As well as the reversible inhibition of proton-gated currents in DRG neurons by APETx2, in a heterologous expression system we observed that nmrASIC3 appears to form heteromers with both ASIC1b and ASIC2a, which would suggest that *in vivo* it acts to modulate ASIC currents, just like ASIC2b and ASIC4.

With regard to understanding the basis of nmrASIC3 proton-insensitivity, manipulation of the few amino acid variations that we identified from a multiple sequence alignment neither abolished rASIC3 proton-sensitivity, nor rescued nmrASIC3 proton-sensitivity and thus it remains unclear why nmrASIC3 fails to respond to protons. Of the 3 carboxylate pairs contained within the acidic pocket identified from the crystal structure of cASIC1 that were proposed to be critical for proton activation of ASICs (D238–D350, E239–D346, and E220–D408; cASIC1a numbering) (2), D238 is replaced by glutamate and D346 is actually replaced by a serine in mASIC3 and rASIC3. Lacking the full set of carboxylates in the proton-sensitive mASIC3 and rASIC3 confirms earlier results from ourselves and others highlighting that although the acidic pocket is involved in proton activation of ASICs, it alone is not responsible for proton activation of ASICs (13–18). In nmrASIC3, E220 becomes D210, E239 becomes D229 and D346 is actually retained D352, thus nmrASIC3 actually has a full set of carboxylates in the acidic pocket, and although two glutamates are replaced by aspartates, which would have a different pKa, they are still protonatable residues. A series of mutations have been made in rASIC3, two of which were similar to those in this study, E63A and R102A, and although EC<sub>50</sub>s for these mutants

are not reported, both responded to protons and E63A was observed to slow down the rate of inactivation (49), whereas here we observed that the inactivation time constant was more rapid in rASIC3E62A. However, Cushman *et al.* stimulated using pH 6.0 from a starting point of pH 8.0, whereas here we stimulated using pH 4.0 from a starting point of pH 7.4, which may explain the difference observed. Taken together the results presented here it remains unclear why nmrASIC3 is proton-insensitive.

Considering the varied physiology with which ASIC3 is concerned, the fact that nmrASIC3 forms non-functional homomers may be a further adaptation to living in a hypercapnic environment. Future experiments determining the role of ASIC3 in different brain regions of the naked mole-rat will be required to understand just how the proton insensitivity of nmrASIC3 influences brain function.

## Experimental Procedures

### *Animals*

All experiments were conducted in accordance with the United Kingdom Animal (Scientific Procedures) Act 1986 Amendment Regulations 2012 under a Project License (70/7705) granted to E. St. J. S. by the Home Office; the University of Cambridge Animal Welfare Ethical Review Body also approved procedures. Young adult naked mole-rats were used in this study: 2 males and 1 female aged between 3.5 and 4.5 years. Animals were maintained in a custom-made caging system with conventional mouse/rat cages connected by different lengths of tunnel. Bedding and nesting material were provided along with a running wheel. The room was warmed to 28 °C, with a heat cable to provide extra warmth running under 2-3 cages, and red lighting (08:00 – 16:00) was used.

### *Chinese hamster ovary cell culture and transfection*

Chinese hamster ovary (CHO) cells (Sigma-Aldrich) were grown using standard procedures in the following medium: Ham's F-12 Nutrient Mixture (Life Technologies), 10 % fetal bovine serum (Sigma), 1 % Penicillin/Streptomycin 100 U/ml (Life Technologies). 24-hours before transfecting cells, 35 mm dishes (Fisher) were coated with 100 µg/ml poly-L-lysine (Sigma) and

### *Naked mole-rat ASIC3 is proton insensitive*

cells from a 70-80% confluent flask were trypsinized, resuspended in 5 ml CHO medium and a volume was taken to seed cells at a 1:10 dilution, 2 ml/dish. For transfections, an EGFP expression vector was used to enable identification of transfected cells and DNA was transfected at a ratio of 10:1, ASICx:GFP, or 5:5:1 in c-transfection experiments, using 0.9 µg ASICx DNA and 0.09 µg EGFP DNA (2 µg DNA was used for nmrASIC3); the transfection reagent Lipofectamine LTX (Life Technologies) was used according to the manufacturer's protocol.

### *Cloning and mutagenesis*

mASIC3 and nmrASIC3 was amplified from mouse and naked mole-rat whole brain cDNA, respectively, using forward (fw, mASIC3: atgaaacctcctcaggactgga, nmrASIC3: aagagccctcgggatggagga) and reverse primers (rv, mASIC3: ctagagccttgcacgaggaaca, nmrASIC3: ctagaatcactagttgcccgggat), cloned into pIRES or pTarget expression plasmid and confirmed by sequencing. Rat ASIC2a cDNA in a pCI expression plasmid and nmrASIC1b in pEGFP-N3 have been previously described (18, 33). Mutations were inserted with the FastCloning method (50) using primer pairs specific to the construct (mASIC3-ATG fw aaacctcctcaggatggagga,rv cattcctgaggagggtttaccgtcagcagaattcga, nmrASIC3+ATG fw , rv aagagccctcggggctggaggaggctcggagaa, rASIC3A62E fw tctaccaggtggaggagcgggttcg, rv cctggtagaggaagcccgccagcga, rASIC3A62ER102H fw cccactgcgccgctcaca rv gtagggtgtagcggcgca, nmrASIC3E62A fw ctaccaggtggctgagcgggtacgcta, rv acctggtagaggaaggctgccagcga, nmrASIC3H102R fw cgctcagcctcactccaacga, rv cgtgagcggcgagcgggtgatgtt).

### *Biotinylation*

CHO cells were transfected using polyethylenimine (PEI). The cells cultured in 75 cm<sup>2</sup> flasks were approximately 75% confluent. For transfection, to 1 mL of serum-free DMEM media, 25 mg of total plasmid DNA encoding either mASIC3, nmrASIC3 or rASIC2a was mixed with 15 µL of 7.5 mM PEI. When a combination of plasmids was to be transfected, the concentration of plasmids was split equally. This transfection mixture was incubated for 10 minutes at room temperature and added drop-by-drop to the flask

### *Naked mole-rat ASIC3 is proton insensitive*

which was replaced with fresh growth media prior to addition of the transfection mixture. For isolation of cell-surface biotinylated proteins, 48-hours post transfection, the growth medium was removed from cells. Ice-cold Hepes buffer saline (HBS) (140 mM NaCl, 1.5 mM Na<sub>2</sub>HPO<sub>4</sub>·2H<sub>2</sub>O, 50 mM HEPES, pH 7.05) containing 0.2 mg/mL biotin-sulfo-NHS (Thermo Fisher Scientific, Cat. # 21331) was added to cells and incubation was carried out for 60 minutes on ice. Subsequently, biotin containing HBS was removed and cells were washed at least 3 times with 15 mL of tris-buffered-saline (25 mM Tris-HCl, 150 mM NaCl & 10 mM EDTA, pH 7.4). Cells were collected in the same buffer, pelleted at 1000 g for 5 minutes at 4°C. The pellet was solubilized in solubilization buffer (25 mM Tris-HCl, 150 mM NaCl, 10 mM EDTA, 1% Triton X-100 and 1 mg/mL protease inhibitor (Roche)) for 60 minutes at 4 °C with continuous mixing. This lysis mixture was centrifuged at 50,000 g for 60 minutes at 4 °C and the supernatant was incubated with 50 mL of monomeric avidin-coated agarose beads (Thermo Fisher Scientific) for 2-hours at 4 °C with continuous mixing. The protein-bead complexes were collected by centrifugation at 20,800xg for 10 minutes, washed with the solubilization buffer at least 3 times with a mixing time of 5 minutes between washes. The protein was eluted from the beads using 50 mL Laemmli buffer for immunoblotting. For electrophoresis, 20 mL of the protein-laemmli buffer mix was loaded in the lanes of a 10% acrylamide and SDS-PAGE was carried out. Proteins were then transferred onto a polyvinyl difluoride (PVDF) membrane, blocked with 5% milk-TBS tween20 solution for 60 minutes at room temperature, probed with primary antibody at 4 °C overnight (anti-ASIC2, Abcam, ab77384 (1:250), and anti-ASIC3, Boster, PA1938 (1:250)), washed with 5% milk-TBS tween20 solution and incubated with secondary antibody (anti-mouse HRP, used at 1:1000, Thermo Fisher Scientific, Cat. # 31430; anti-rabbit HRP, used at 1:1000, Bio-Rad, Cat. # 1706515) for 2-hours at room temperature. Blots were washed in distilled water and then developed with West Pico Chemiluminescent Substrate (Thermo Fisher Scientific). Protein samples from beads were checked for any 'biotin-permeabilization' by probing for actin (negative control, A2228, 1:500, Sigma Aldrich).

### *Electrophysiology*

Dorsal root ganglion (DRG) neurons were cultured as described previously (33, 38). Whole-cell patch clamp recordings from CHO cells were performed at room temperature 24-hours after transfection and recordings from DRG neurons 24-hours after culturing. For all ASIC experiments, the intracellular solution contained 110 mM KCl, 10 mM NaCl, 1 mM MgCl<sub>2</sub>, 1 mM EGTA, 10 mM HEPES, 2 mM Na<sub>2</sub>ATP, 0.5 mM Na<sub>2</sub>GTP in MilliQ water; pH was set to pH 7.3 by adding KOH and the osmolality was adjusted to 310-315 mOsm with sucrose. The extracellular solution contained 140 mM NaCl, 4 mM KCl, 2 mM CaCl<sub>2</sub>, 1 mM MgCl<sub>2</sub>, 10 mM HEPES (solutions > pH 6) or MES (solutions < pH 6), 4 mM Glucose in MilliQ water; osmolality was adjusted to 300-310 mOsm with sucrose and pH was adjusted with NaOH and HCl. Patch pipettes were pulled from glass capillaries (Hilgenberg) using a Model P-97, Flaming/Brown puller (Sutter Instruments) and had a resistance of 4-10 MΩ. Data was acquired using an EPC10 amplifier (HEKA) and Patchmaster software (HEKA). Solutions containing the synthetic ASIC3 agonist GMQ in pH7.4 were diluted from a stock solution of 50 mM dissolved in DMSO. 2 μM APETx2 were added to the pH 7.4 solution for DRG neuron experiments. For measurement of current amplitude and inactivation time constant, a protocol of 5 s of pH 7.4 followed by a 5 s stimulus with pH 3, pH 4 or GMQ solution and then a return to pH 7.4 solution for 5 s was used; the holding potential was -60 mV for both DRG neurons and CHO cells. For pH-response curves, 2.5 s stimuli between pH 3 and pH 6 (ASIC2) or 1s stimuli between pH 4 and pH 7.2 (ASIC1, ASIC3) were applied in random order with 30 s of bath solution in between stimuli to minimise desensitization, although this is not a prominent feature of ASIC1b, ASIC2a or ASIC3 (18, 51).

### *Data analysis*

Statistical analysis was performed in Prism (Graphpad), which was also used to plot data. Peak current density was analyzed by measuring the size of the peak current compared to the baseline current (average current measured over 4 seconds prior to stimulation). The absolute current size was then divided by capacitance of the cell to result in normalized peak current density (pA/pF). Peak current density data was transformed using  $y_i = \log_{10}(x_i)$ . The inactivation time constant  $\tau$  was measured using a built-in function of Fitmaster.

## Naked mole-rat ASIC3 is proton insensitive

Statistical analysis was performed in GraphPad Prism using repeated measures analysis of variance (ANOVA) with Tukey's multiple comparisons for DRG neuron data or ordinary one-way analysis of variance (ANOVA) and Tukey's multiple comparisons, comparing data from each construct with every other construct of the same experiment for transformed peak current density data and inactivation data of CHO cell experiments. Results are expressed as mean and standard error of the mean (SEM), unless otherwise stated; this might, however, not necessarily represent the statistical differences for peak current density data, which were transformed as above. Sustained current to transient current ratio was calculated by measuring the size of the sustained current at the end of the stimulus compared to the baseline current and dividing his value by the peak current ( $I_{\text{sus}}/I_{\text{peak}} \times 100$ ). pH-response curves were plotted by transforming all measurements to percent of the maximum peak current ( $I/I_{\text{max}} \times 100$ ) and using GraphPad's variable slope curve fit with bottom constraint of 0 and top constraint of 100 in accordance with the normalization process and differences were analyzed using a sum-of-squares F test. Figures were made using Adobe Illustrator.

### Multiple sequence alignment

ASIC3 protein sequences were obtained from the NCBI genome database or ENSEMBL (mouse NM\_183000, naked mole-rat PREHGLG00000022115, rat NM\_173135.1, guinea pig ENSCPOT00000020999, blind mole-rat XM\_008847215.1, Damaraland mole-rat XM\_010637570.1, rabbit ENSRNOG00000058308, human ENSG00000213199, large flying fox ENSPVAG0000007091, little brown bat ENSMLUG00000028175). Naked mole-rat sequences that were not previously annotated were identified using NCBI's basic local alignment search tool (BLAST) online. Sequences were aligned using MAFFT version 7 using default settings with an un-alignment factor of 0.8. Sequences were visualized and manipulated in Jalview. Alignments are shaded by BLOSUM62 score which indicates the likelihood that two amino acids are aligned because they are homologous (52). Dark blue indicates that the residues agree with the consensus sequence (>80% homology), medium blue that they have a positive BLOSUM62 score (corresponding to >62% likelihood of homology), light blue represents >40% homology and white residues are not homologous (<40% homology).

### Acknowledgments

L.-N. S. was a student in the Biotechnology and Biological Sciences Research Council Doctoral Training Programme [Grant BB/J014540/1] and a recipient of the David James Pharmacology Award. S. S. was supported by the Cambridge International and European Trust. E. St .J. S. acknowledges a Royal Society Research Grant (RG130110). G.C. and E. St .J. S. acknowledge funding from Arthritis Research UK (Grant Reference 20930). All authors thank members of the Smith lab for assistance in the lab, especially J. Bartlett, J. Raby and L. Rockall, and are grateful to the support of animal technicians in particular H. R. Forest and A. J. Robinson. The authors are also grateful for discussion of the project with Prof. G Lewin and Dr D. Omerbašić.

### Conflict of Interest

The authors declare that they have no conflicts of interest with the contents of this article.

### Author Contributions

LNS and EStJS conceived and designed the study. LNS created constructs, conducted electrophysiology experiments and analyzed the data. SS conducted biotinylation experiments. GC conducted some CHO cell electrophysiology experiments. EStJS conducted DRG neuron electrophysiology experiments. All authors contributed to writing the manuscript.

1. Boscardin, E., Alijevic, O., Hummler, E., Frateschi, S., and Kellenberger, S. (2016) The function and regulation of acid-sensing ion channels (ASICs) and the epithelial  $\text{Na}^+$  channel (ENaC): IUPHAR Review 19: ASIC and ENaC nomenclature. *Brit. J. Pharm.* **173**, 2671–2701
2. Jasti, J., Furukawa, H., Gonzales, E. B., and Gouaux, E. (2007) Structure of acid-sensing ion channel 1 at 1.9 Å resolution and low pH. *Nature.* **449**, 316–23



*Naked mole-rat ASIC3 is proton insensitive*

3. Jeggle, P., Smith, E. S. J., Stewart, A. P., Haerteis, S., Korbmacher, C., and Edwardson, J. M. (2015) Atomic force microscopy imaging reveals the formation of ASIC/ENaC cross-clade ion channels. *Biochem. Biophys. Res. Commun.* **464**, 38–44
4. Kapoor, N., Lee, W., Clark, E., Bartoszewski, R., McNicholas, C. M., Latham, C. B., Bebok, Z., Parpura, V., Fuller, C. M., Palmer, C. A., and Benos, D. J. (2011) Interaction of ASIC1 and ENaC subunits in human glioma cells and rat astrocytes. *Am. J. Physiol. Cell. Physiol.* **300**, C1246–C1259
5. Tominaga, M., Caterina, M. J., Malmberg, A. B., Rosen, T. A., Gilbert, H., Skinner, K., Raumann, B. E., Basbaum, A. I., and Julius, D. (1998) The cloned capsaicin receptor integrates multiple pain-producing stimuli. *Neuron*. **21**, 531–43
6. Gründer, S., and Pusch, M. (2015) Biophysical properties of acid-sensing ion channels (ASICs). *Neuropharmacol.* **94**, 9–18
7. Hesselager, M., Timmermann, D. B., and Ahring, P. K. (2004) pH Dependency and desensitization kinetics of heterologously expressed combinations of acid-sensing ion channel subunits. *J. Biol. Chem.* **279**, 11006–15
8. Diochot, S., Baron, A., Rash, L. D., Deval, E., Escoubas, P., Scarzello, S., Salinas, M., and Lazdunski, M. (2004) A new sea anemone peptide, APETx2, inhibits ASIC3, a major acid-sensitive channel in sensory neurons. *EMBO J.* **23**, 1516–25
9. Lingueglia, E., de Weille, J. R., Bassilana, F., Heurteaux, C., Sakai, H., Waldmann, R., and Lazdunski, M. (1997) A modulatory subunit of acid sensing ion channels in brain and dorsal root ganglion cells. *J. Biol. Chem.* **272**, 29778–83
10. Akopian, A. N., Chen, C. C., Ding, Y., Cesare, P., and Wood, J. N. (2000) A new member of the acid-sensing ion channel family. *Neurorep.* **11**, 2217–22
11. Grunder, S., Geissler, H. S., Bassler, E. L., and Ruppertsberg, J. P. (2000) A new member of acid-sensing ion channels from pituitary gland. *Neurorep.* **11**, 1607–11
12. Donier, E., Rugiero, F., Jacob, C., and Wood, J. N. (2008) Regulation of ASIC activity by ASIC4--new insights into ASIC channel function revealed by a yeast two-hybrid assay. *Eur. J. Neurosci.* **28**, 74–86
13. Smith, E. S., Zhang, X., Cadiou, H., and McNaughton, P. A. (2007) Proton binding sites involved in the activation of acid-sensing ion channel ASIC2a. *Neurosci. Lett.* **426**, 12–7
14. Paukert, M., Chen, X., Polleichtner, G., Schindelin, H., and Grunder, S. (2008) Candidate amino acids involved in H<sup>+</sup> gating of acid-sensing ion channel 1a. *J. Biol. Chem.* **283**, 572–81
15. Li, T., Yang, Y., and Canessa, C. M. (2009) Interaction of the aromatics Tyr-72/Trp-288 in the interface of the extracellular and transmembrane domains is essential for proton gating of acid-sensing ion channels. *J. Biol. Chem.* **284**, 4689–4694
16. Liechti, L. A., Bernèche, S., Bargeton, B., Iwazskiewicz, J., Roy, S., Michielin, O., and Kellenberger, S. (2010) A Combined Computational and Functional Approach Identifies New Residues Involved in pH-dependent Gating of ASIC1a. *J. Biol. Chem.* **285**, 16315–16329
17. Della Vecchia, M. C., Rued, A. C., and Carattino, M. D. (2013) Gating transitions in the palm domain of ASIC1a. *J. Biol. Chem.* **288**, 5487–5495
18. Schuhmacher, L.-N., Srivats, S., and Smith, E. S. J. (2015) Structural domains underlying the activation of Acid-sensing ion channel 2a. *Mol. Pharmacol.* **87**, 561–571
19. Price, M. P., McIlwrath, S. L., Xie, J., Cheng, C., Qiao, J., Tarr, D. E., Sluka, K. A., Brennan, T. J., Lewin, G. R., and Welsh, M. J. (2001) The DRASIC cation channel contributes to the detection of cutaneous touch and acid stimuli in mice. *Neuron*. **32**, 1071–83
20. Deval, E., Noel, J., Lay, N., Alloui, A., Diochot, S., Friend, V., Jodar, M., Lazdunski, M., and Lingueglia, E. (2008) ASIC3, a sensor of acidic and primary inflammatory pain. *EMBO J.* **27**, 3047–55
21. Izumi, M., Ikeuchi, M., Ji, Q., and Tani, T. (2012) Local ASIC3 modulates pain and disease progression in a rat model of osteoarthritis. *J. Biomed. Sci.* **19**, 77
22. Ikeuchi, M., Kolker, S. J., Burnes, L. A., Walder, R. Y., and Sluka, K. A. (2008) Role of ASIC3 in the primary and secondary hyperalgesia produced by joint inflammation in mice. *Pain*. **137**, 662–669

*Naked mole-rat ASIC3 is proton insensitive*

23. Hiasa, M., Okui, T., Allette, Y. M., Ripsch, M. S., Sun-Wada, G.-H., Wakabayashi, H., Roodman, G. D., White, F. A., and Yoneda, T. (2017) Bone Pain Induced by Multiple Myeloma Is Reduced by Targeting V-ATPase and ASIC3. *Canc. Res.* **77**, 1283–1295
24. Callejo, G., Castellanos, A., Castany, M., Gual, A., Luna, C., Acosta, M. C., Gallar, J., Giblin, J. P., and Gasull, X. (2015) Acid-sensing ion channels detect moderate acidifications to induce ocular pain. *Pain.* **156**, 483–495
25. Reimers, C., Lee, C.-H., Kalbacher, H., Tian, Y., Hung, C.-H., Schmidt, A., Prokop, L., Kaufenstein, S., Mebs, D., Chen, C.-C., and Gründer, S. (2017) Identification of a cono-RFamide from the venom of *Conus textile* that targets ASIC3 and enhances muscle pain. *Proc. Natl. Acad. Sci. U.S.A.* **114**, E3507–E3515
26. Peng, Z., Li, W.-G., Huang, C., Jiang, Y.-M., Wang, X., Zhu, M. X., Cheng, X., and Xu, T.-L. (2015) ASIC3 Mediates Itch Sensation in Response to Coincident Stimulation by Acid and Nonproton Ligand. *Cell Rep.* **13**, 387–398
27. Jones, R. C., Xu, L., and Gebhart, G. F. (2005) The mechanosensitivity of mouse colon afferent fibers and their sensitization by inflammatory mediators require transient receptor potential vanilloid 1 and acid-sensing ion channel 3. *J. Neurosci.* **25**, 10981–9
28. Wu, W.-L., Lin, Y.-W., Min, M.-Y., and Chen, C.-C. (2010) Mice lacking *Asic3* show reduced anxiety-like behavior on the elevated plus maze and reduced aggression. *Genes Brain Behav.* **9**, 603–614
29. Waldmann, R., Bassilana, F., de Weille, J., Champigny, G., Heurteaux, C., and Lazdunski, M. (1997) Molecular cloning of a non-inactivating proton-gated Na<sup>+</sup> channel specific for sensory neurons. *J. Biol. Chem.* **272**, 20975–8
30. Schuhmacher, L.-N., and Smith, E. S. J. (2016) Expression of acid-sensing ion channels and selection of reference genes in mouse and naked mole rat. *Mol. Brain.* **9**, 97
31. Meng, Q. Y., Wang, W., Chen, X. N., Xu, T. L., and Zhou, J. N. (2009) Distribution of acid-sensing ion channel 3 in the rat hypothalamus. *Neurosci.* **159**, 1126–34
32. Park, T. J., Lu, Y., Juttner, R., Smith, E. S., Hu, J., Brand, A., Wetzell, C., Milenkovic, N., Erdmann, B., Heppenstall, P. A., Laurito, C. E., Wilson, S. P., and Lewin, G. R. (2008) Selective inflammatory pain insensitivity in the African naked mole-rat (*Heterocephalus glaber*). *PLoS Biol.* **6**, e13
33. Smith, E. S. J., Omerbašić, D., Lechner, S. G., Anirudhan, G., Lapatsina, L., and Lewin, G. R. (2011) The Molecular Basis of Acid Insensitivity in the African Naked Mole-Rat. *Science.* **334**, 1557–1560
34. Liu, Z., Wang, W., Zhang, T.-Z., Li, G.-H., He, K., Huang, J.-F., Jiang, X.-L., Murphy, R. W., and Shi, P. (2013) Repeated functional convergent effects of NaV1.7 on acid insensitivity in hibernating mammals. *Proceedings of the Royal Society B: Biological Sciences.* **281**, 20132950–20132950
35. LaVinka, P. C., and Park, T. J. (2012) Blunted Behavioral and C Fos Responses to Acidic Fumes in the African Naked Mole-Rat. *PLoS ONE.* **7**, e45060
36. LaVinka, P. C., Brand, A., Landau, V. J., Wirtshafter, D., and Park, T. J. (2009) Extreme tolerance to ammonia fumes in African naked mole-rats: animals that naturally lack neuropeptides from trigeminal chemosensory nerve fibers. *J. Comp. Physiol. A.* **195**, 419–27
37. Park, T. J., Reznick, J., Peterson, B. L., Blass, G., Omerbašić, D., Bennett, N. C., Kuich, P. H. J. L., Zasada, C., Browe, B. M., Hamann, W., Applegate, D. T., Radke, M. H., Kosten, T., Lutermann, H., Gavaghan, V., Eigenbrod, O., Bégay, V., Amoroso, V. G., Govind, V., Minshall, R. D., Smith, E. S. J., Larson, J., Gotthardt, M., Kempa, S., and Lewin, G. R. (2017) Fructose-driven glycolysis supports anoxia resistance in the naked mole-rat. *Science.* **356**, 307–311
38. Omerbašić, D., Smith, E. S. J., Moroni, M., Homfeld, J., Eigenbrod, O., Bennett, N. C., Reznick, J., Faulkes, C. G., Selbach, M., and Lewin, G. R. (2016) Hypofunctional TrkA Accounts for the Absence of Pain Sensitization in the African Naked Mole-Rat. *Cell Rep.* **17**, 748–758
39. Kweon, H.-J., Kim, D.-I., Bae, Y., Park, J.-Y., and Suh, B.-C. (2016) Acid-Sensing Ion Channel 2a (ASIC2a) Promotes Surface Trafficking of ASIC2b via Heteromeric Assembly. *Sci. Rep.* **6**, 30684
40. Kweon, H.-J., Cho, J.-H., Jang, I.-S., and Suh, B.-C. (2016) ASIC2a-dependent increase of ASIC3 surface expression enhances the sustained component of the currents. *BMB Rep.* **49**, 542–547

*Naked mole-rat ASIC3 is proton insensitive*

41. Smith, E. S., and Lewin, G. R. (2009) Nociceptors: a phylogenetic view. *J. Comp. Physiol. A.* **195**, 1089–1106
42. Schuhmacher, L.-N., Husson, Z., and Smith, E. S. (2015) The naked mole-rat as an animal model in biomedical research: current perspectives. *Open Acc Anim Phys*
43. Garbarino, V. R., Orr, M. E., Rodriguez, K. A., and Buffenstein, R. (2015) Mechanisms of oxidative stress resistance in the brain: Lessons learned from hypoxia tolerant extremophilic vertebrates. *Arch. Biochem. Biophys.* **576**, 8–16
44. Rice, P., Longden, I., and Bleasby, A. (2000) EMBOS: The European Molecular Biology Open Software Suite. *Trends in Genetics.* **16**, 276–277
45. Ziemann, A. E., Allen, J. E., Dahdaleh, N. S., Drobot, I. I., Coryell, M. W., Wunsch, A. M., Lynch, C. M., Faraci, F. M., Howard, M. A., Welsh, M. J., and Wemmie, J. A. (2009) The Amygdala Is a Chemosensor that Detects Carbon Dioxide and Acidosis to Elicit Fear Behavior. *Cell.* **139**, 1012–1021
46. Benson, C. J., Xie, J., Wemmie, J. A., Price, M. P., Henss, J. M., Welsh, M. J., and Snyder, P. M. (2002) Heteromultimers of DEG/ENaC subunits form H<sup>+</sup>-gated channels in mouse sensory neurons. *Proc. Natl. Acad. Sci. U.S.A.* **99**, 2338–2343
47. Diochot, S., Baron, A., Salinas, M., Douguet, D., Scarzello, S., Dabert-Gay, A.-S., Debayle, D., Friend, V., Alloui, A., Lazdunski, M., and Lingueglia, E. (2012) Black mamba venom peptides target acid-sensing ion channels to abolish pain. *Nature.* **490**, 552–555
48. Escoubas, P., De Weille, J. R., Lecoq, A., Diochot, S., Waldmann, R., Champigny, G., Moinier, D., Ménez, A., and Lazdunski, M. (2000) Isolation of a Tarantula Toxin Specific for a Class of Proton-gated Na<sup>+</sup> Channels. *J. Biol. Chem.* **275**, 25116–25121
49. Cushman, K. A., Marsh-Haffner, J., Adelman, J. P., and McCleskey, E. W. (2007) A Conformation Change in the Extracellular Domain that Accompanies Desensitization of Acid-sensing Ion Channel (ASIC) 3. *J. Gen. Physiol.* **129**, 345–350
50. Li, C., Wen, A., Shen, B., Lu, J., Huang, Y., and Chang, Y. (2011) FastCloning: a highly simplified, purification-free, sequence- and ligation-independent PCR cloning method. *BMC Biotech.* **11**, 92
51. Chen, X., and Grunder, S. (2007) Permeating protons contribute to tachyphylaxis of the acid-sensing ion channel (ASIC) 1a. *J Physiol.* **579**, 657–70
52. Henikoff, S., and Henikoff, J. G. (1992) Amino acid substitution matrices from protein blocks. *Proc. Natl. Acad. Sci. U.S.A.* **89**, 10915–10919

**Table 1**

|                      | Peak current density (pA/pF) | $I_{\text{sus}}/I_{\text{peak}}$ (%) | Inactivation Time Constant (msec) | EC <sub>50</sub> | Hill coefficient |
|----------------------|------------------------------|--------------------------------------|-----------------------------------|------------------|------------------|
| nmrASIC1b            | 20 ± 3 (21)                  | 12 ± 2 (17)                          | 118 ± 7 (21)                      | 6.09 ± 0.05 (10) | 1.06 ± 0.11      |
| nmrASIC3 + nmrASIC1b | 67 ± 13(18)                  | 34 ± 5 (18)                          | 125 ± 7 (17)                      | 5.61 ± 0.05 (12) | 0.83 ± 0.09      |
| nmrASIC3 + rASIC2a   | 455 ± 217 (10)               | 19 ± 4 (6)                           | 1637 ± 62                         | 3.65 ± 0.05 (11) | 1.36 ± 0.19      |
| mASIC3               | 70 ± 16 (19)                 | 61 ± 5 (16)                          | 210 ± 14 (16)                     | 6.00 ± 0.08 (11) | 0.59 ± 0.08      |
| mASIC3-ATG           | 109 ± 51 (8)                 | ND                                   | 352 ± 31 (9)                      | 5.96 ± 0.09 (14) | 0.63 ± 0.09      |
| mASIC3 + nmrASIC1b   | 193 ± 48 (14)                | 31 ± 4 (15)                          | 93 ± 5 (14)                       | 5.57 ± 0.07 (9)  | 0.72 ± 0.10      |
| mASIC3 + rASIC2a     | 129 ± 23 (13)                | 141 ± 25 (13)                        | 80 ± 10 (4)                       | 4.48 ± 0.09 (17) | 0.51 ± 0.05      |
| rASIC3               | 499 ± 145 (10)               | 45 ± 6 (10)                          | 580 ± 33 (5)                      | 6.38 ± 0.08 (13) | 0.56 ± 0.09      |
| rASIC3A62E           | 705 ± 219 (7)                | 43 ± 31 (7)                          | 343 ± 47 (13)                     | 5.98 ± 0.10 (6)  | 0.60 ± 0.08      |
| rASIC3A62E102H       | 673 ± 213 (8)                | 26 ± 6 (8)                           | 191 ± 14 (8)                      | 6.15 ± 0.08 (7)  | 0.62 ± 0.09      |
| rASIC2a              | 421 ± 58 (50)                | 29 ± 6 (8)                           | 1220 ± 108 (17)                   | 4.43 ± 0.05 (14) | 0.91 ± 0.09      |

## Figure Legends

**Table 1.** Summary data of peak current density,  $I_{\text{sus}}/I_{\text{peak}}$ ,  $EC_{50}$  and Hill coefficient for all constructs tested. Numbers in parentheses refer to number of cells tested, details of statistical comparisons are not included for clarity, refer to graphs. ND, not determined.

**Figure 1.** Representative traces of currents recorded during stimulation with low pH or GMQ. Currents recorded from CHO cells expressing mASIC3 (A), rASIC3 (B) or nmrASIC3 (C) stimulated with either pH 4.0 or pH 3.0 solution. D, Western blot of whole cell lysates (input) and biotinylated surface fraction from cells transfected with mASIC3, nmrASIC3 or co-transfected with m/nmrASIC3 and rASIC2a and stained with anti-ASIC3 antibody, anti-ASIC2 antibody or anti- $\beta$ -Actin antibody.

**Figure 2.** APETx2 blocks transient currents in naked mole-rat DRG neurons. Representative ASIC-like (A) or TRPV1-like (B) current traces recorded from DRG neurons stimulated with pH 5.0 before APETx2 application, immediately after application of 2  $\mu$ M APETx2 for 30 s, and after 30 s wash at pH 7.4. C, Quantification of results showing that ASIC-like transient currents were significantly and reversibly inhibited by APETx2 while TRPV1-like sustained currents were not affected. Bars represent mean and standard error of the mean. Data were analyzed by paired t-test. \*\*P < 0.01.

**Figure 3.** Characterization of CHO cells co-expressing nmrASIC1b and mASIC3 or nmrASIC3. A, Currents recorded from CHO cells expressing mASIC3, nmrASIC1b, mASIC3 + nmrASIC1b or nmrASIC3 + nmrASIC1b. Quantification of  $\log_{10}$  peak current density (B), inactivation time constant (C) and  $I_{\text{sus}}/I_{\text{peak}}$  (D). Bars represent mean and standard error of the mean. E, pH-response curves of mASIC3, nmrASIC1b, mASIC3 + nmrASIC1b and nmrASIC3 + nmrASIC1b. Data were analyzed by ANOVA with Tukey's multiple comparison test. \*\*\*P < 0.001 \*\*P < 0.01 comparing all conditions.

**Figure 4.** Characterization of CHO cells co-expressing rASIC2a and mASIC3 or nmrASIC3. A, Currents recorded from CHO cells expressing mASIC3, rASIC2a, mASIC3 + rASIC2a or nmrASIC3 + rASIC2a. Quantification of  $\log_{10}$  peak current density (B), inactivation time constant (C) and sustained current in proportion to peak current (D). Bars represent mean and standard error of the mean. E, pH-response curves of mASIC3, rASIC2a, mASIC3 + rASIC2a and nmrASIC3 + rASIC2a. Data were analyzed by ANOVA with Tukey's multiple comparison test. \*\*\*P < 0.001 comparing all conditions.

**Figure 5.** Multiple sequence alignment of rodent and human ASIC3 protein including species closely related to naked mole-rat or living in similarly hypoxic/hypercapnic habitats. A, Amino Acids 1 – 10, Methionine is missing in the naked mole-rat (arrow). B, Amino acids 55 – 69, change of alanine 62 to glutamate in naked mole-rat (arrow). C, Amino Acids 99 – 112, change of arginine to histidine in naked mole-rat and Damaraland mole-rat (arrow). D, pH-response curves of mASIC3 and mASIC3-ATG. E, pH-response curves of rASIC3, rASIC3A62E, rASIC3A62ER102H.



# Figure 1

**A** bioRxiv preprint doi: <https://doi.org/10.1101/166332>; this version posted July 21, 2017. The copyright holder for this preprint (which was not certified by peer review) is the author/funder, who has granted bioRxiv a license to display the preprint in perpetuity. It is made available under aCC-BY-ND 4.0 International license.

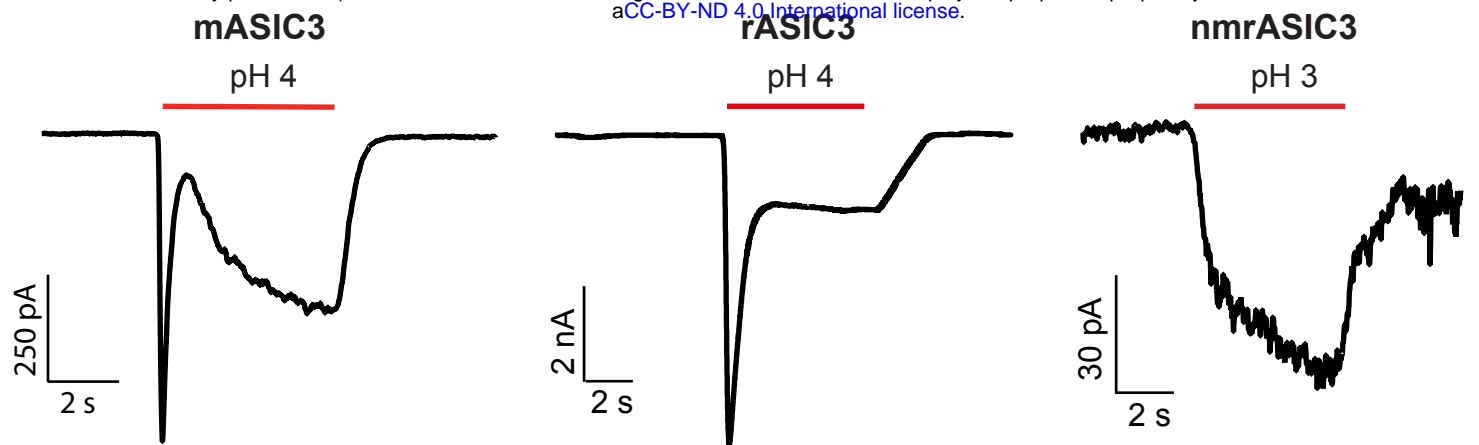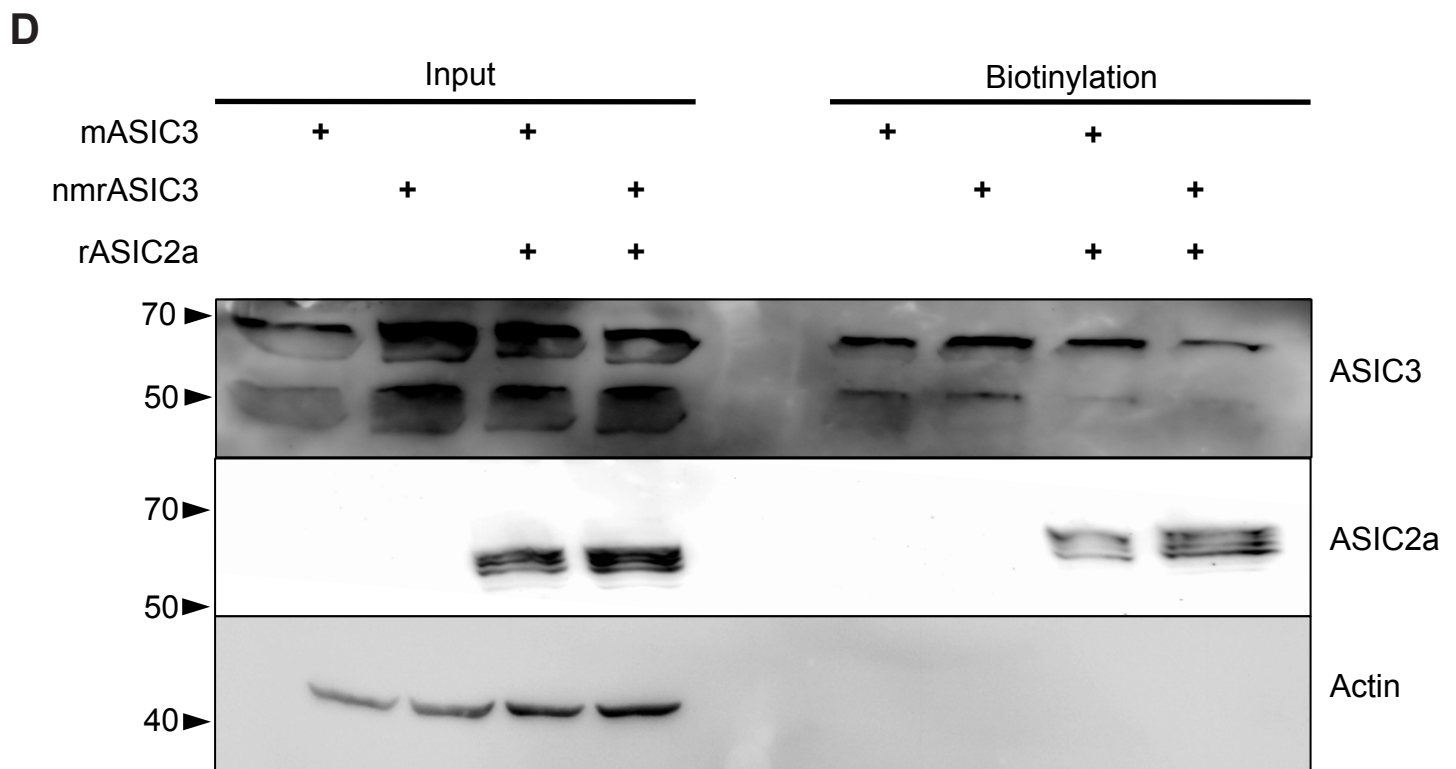

# Figure 2

bioRxiv preprint doi: <https://doi.org/10.1101/166272>; this version posted July 21, 2017. The copyright holder for this preprint (which was not certified by peer review) is the author/funder, who has granted bioRxiv a license to display the preprint in perpetuity. It is made available under aCC-BY-ND 4.0 International license.

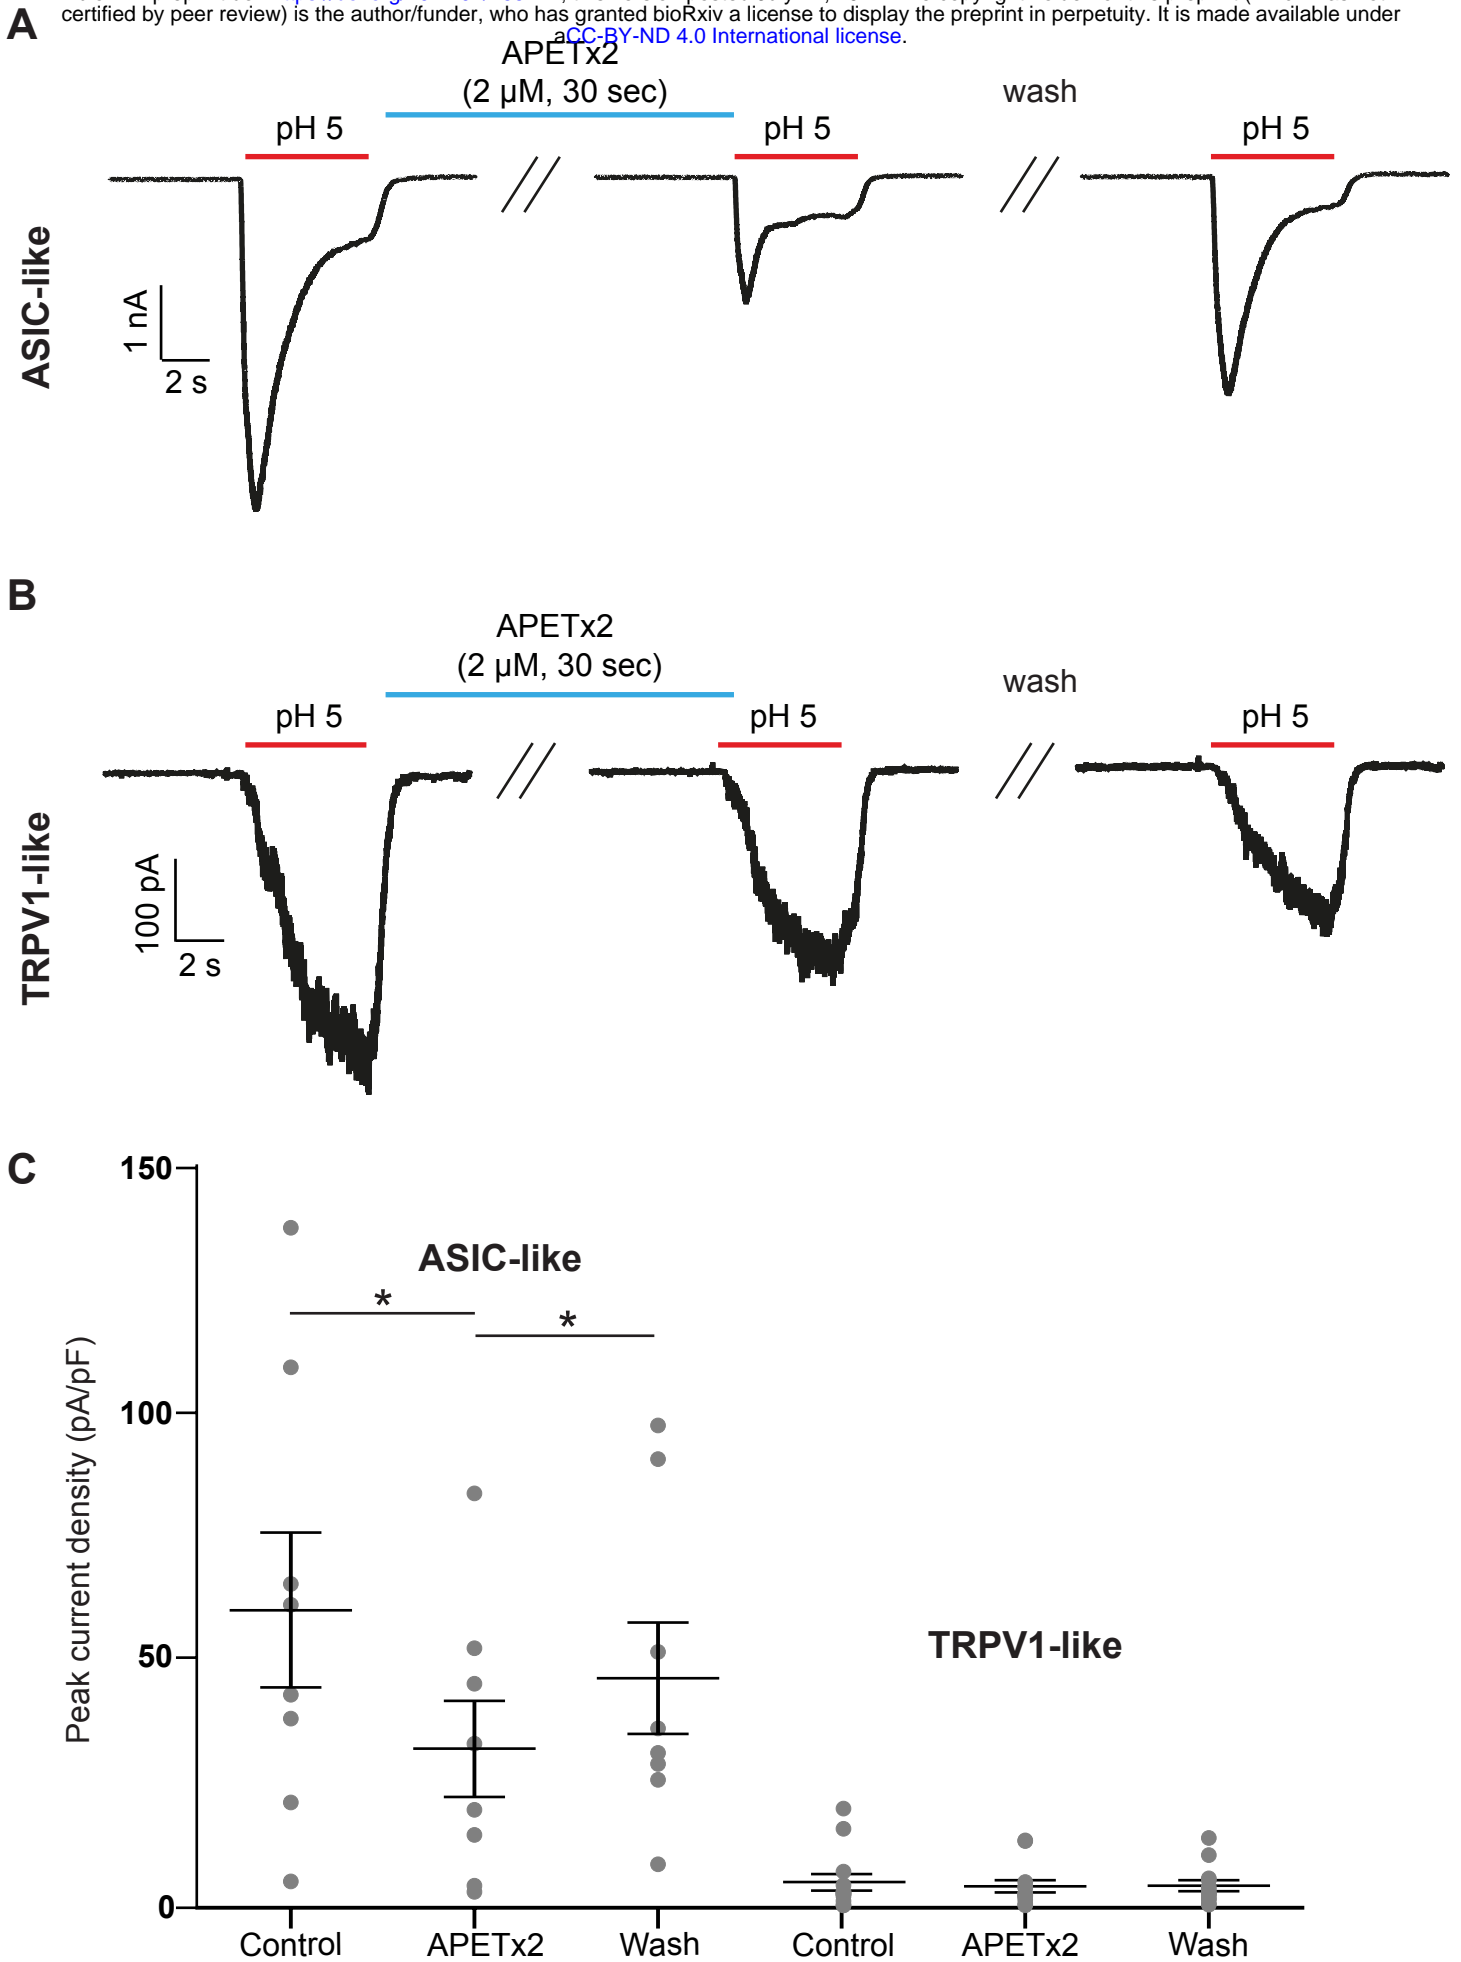

# Figure 3

bioRxiv preprint doi: <https://doi.org/10.1101/166272>; this version posted July 21, 2017. The copyright holder for this preprint (which was not certified by peer review) is the author/funder, who has granted bioRxiv a license to display the preprint in perpetuity. It is made available under aCC-BY-ND 4.0 International license.

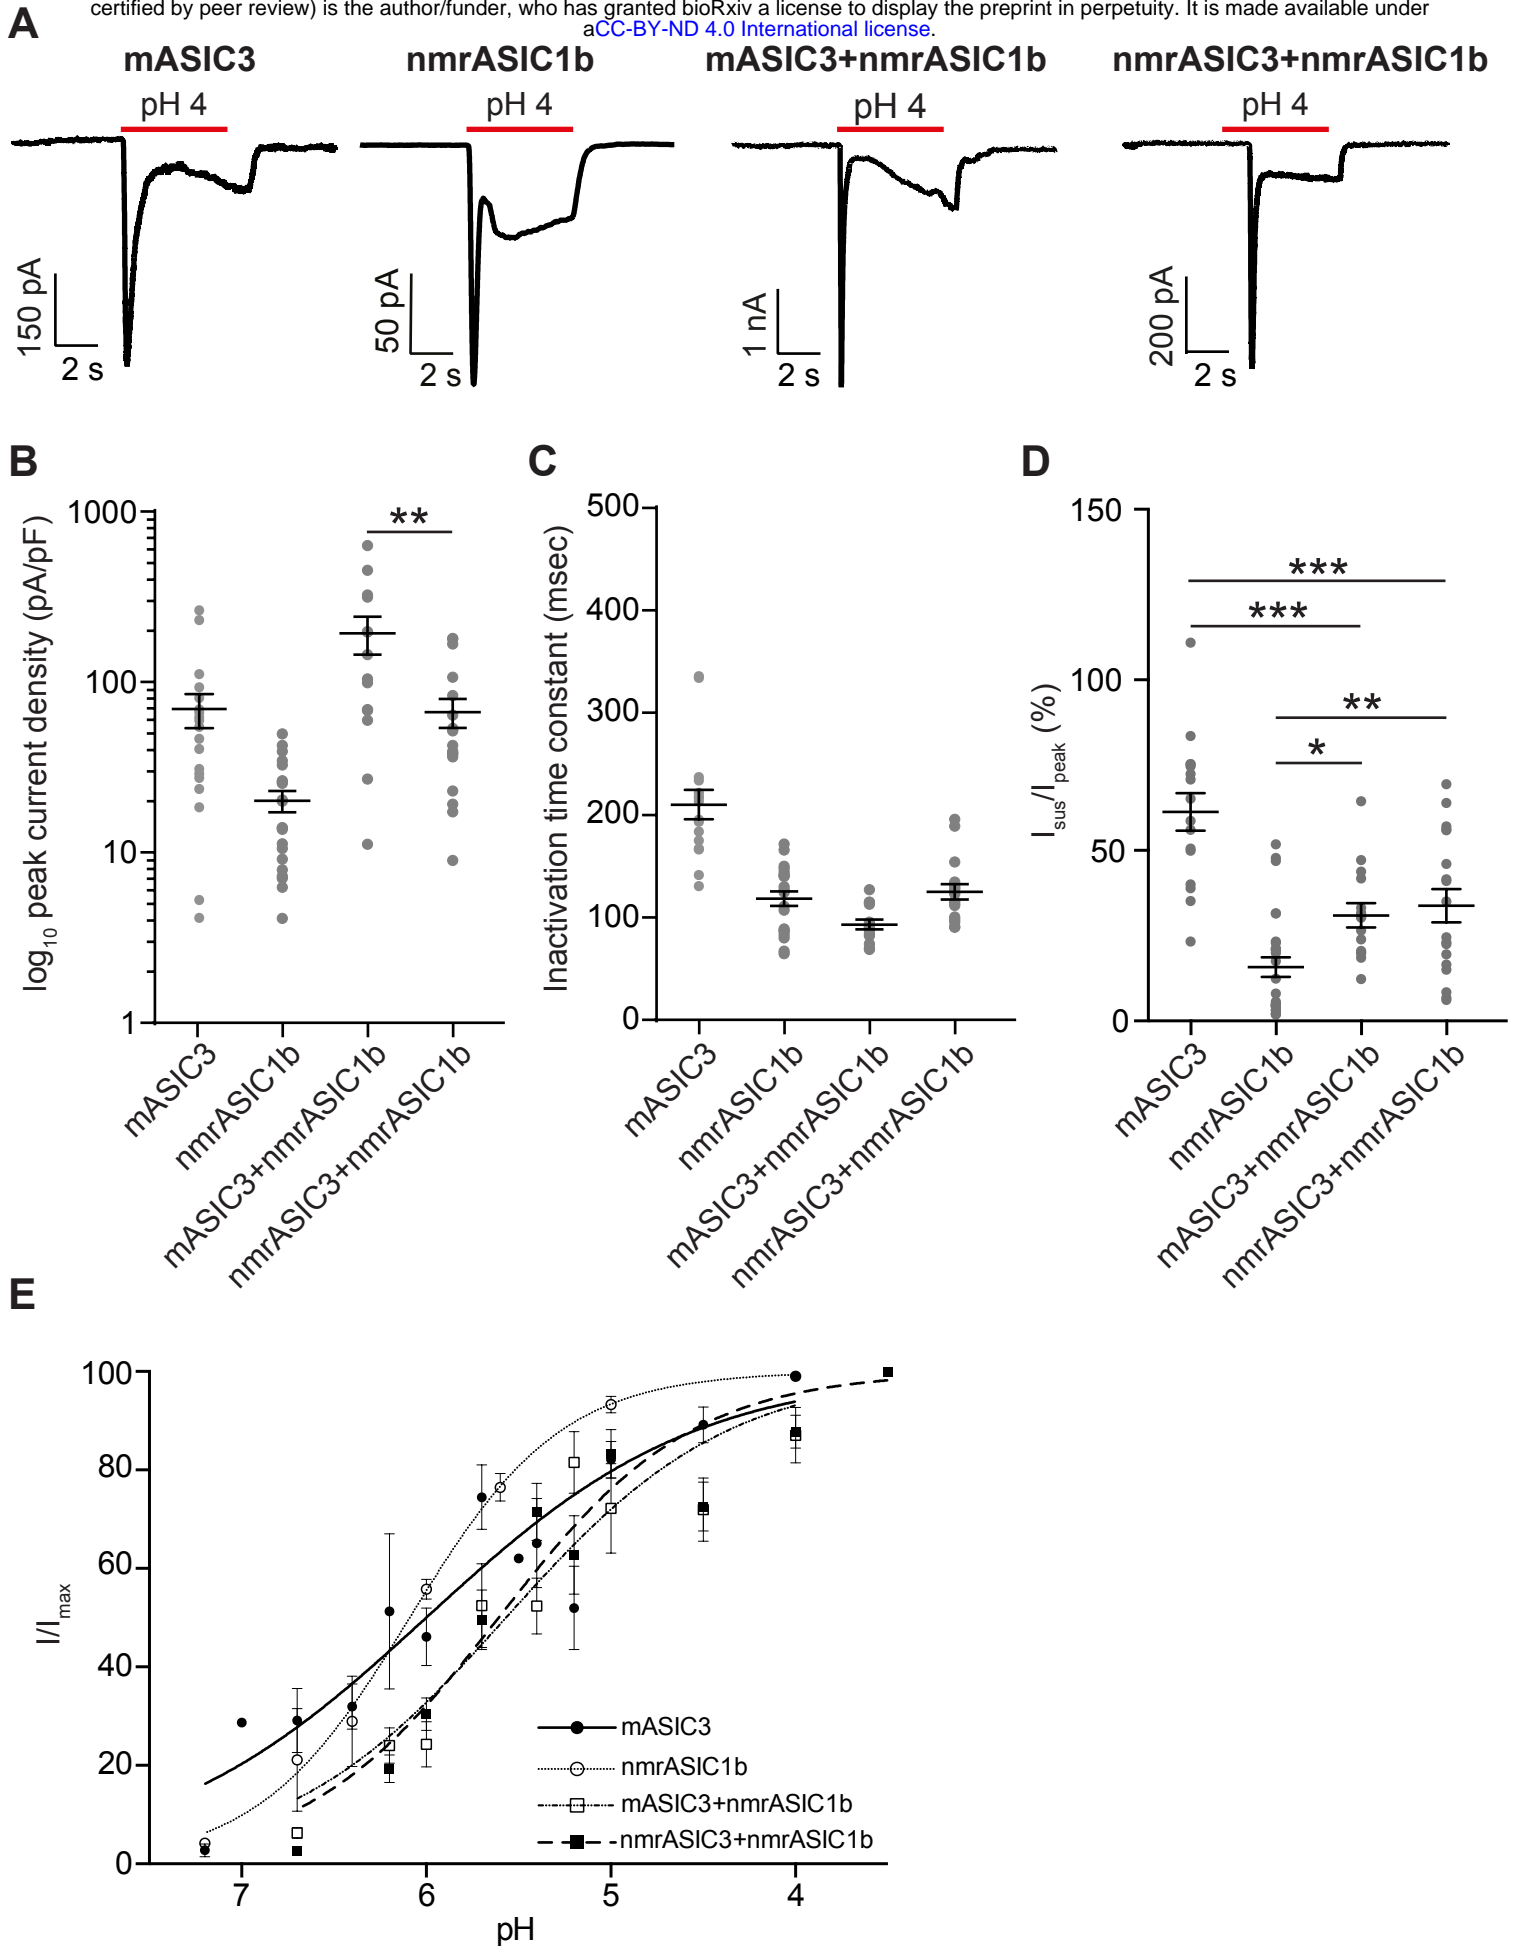

# Figure 4

bioRxiv preprint doi: <https://doi.org/10.1101/166272>; this version posted July 21, 2017. The copyright holder for this preprint (which was not certified by peer review) is the author/funder, who has granted bioRxiv a license to display the preprint in perpetuity. It is made available under aCC-BY-ND 4.0 International license.

**A**

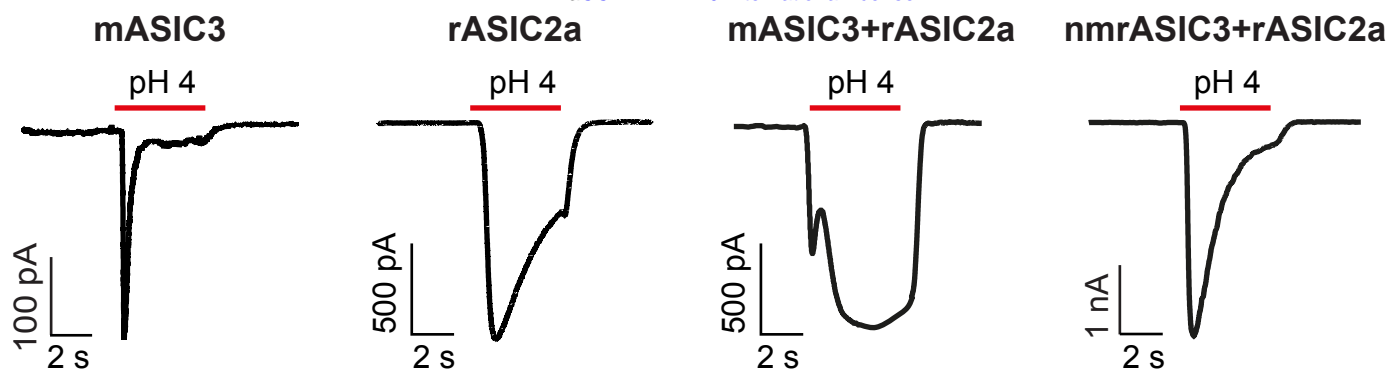

**B**

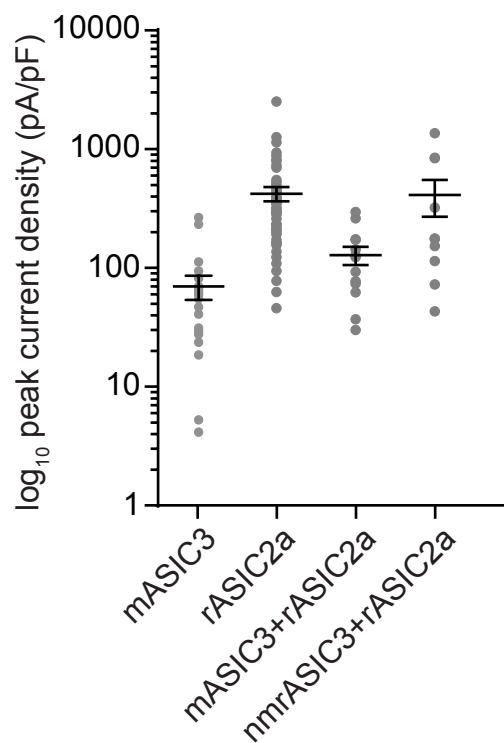

**C**

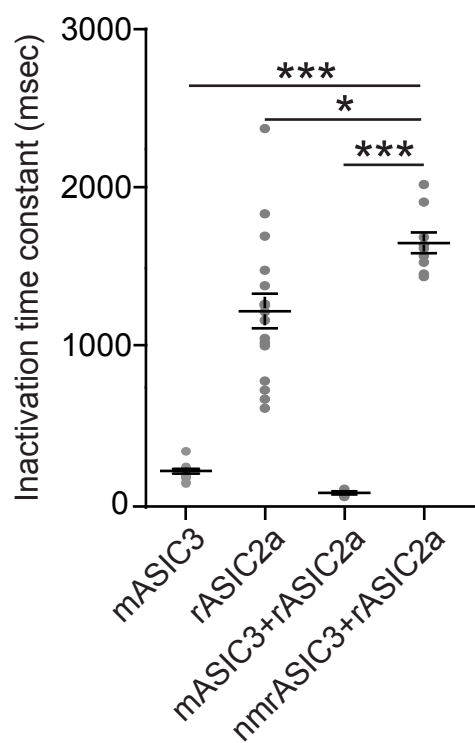

**D**

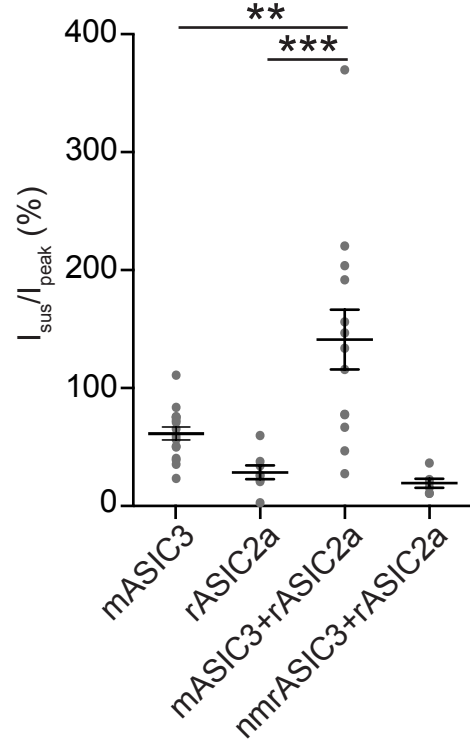

**E**

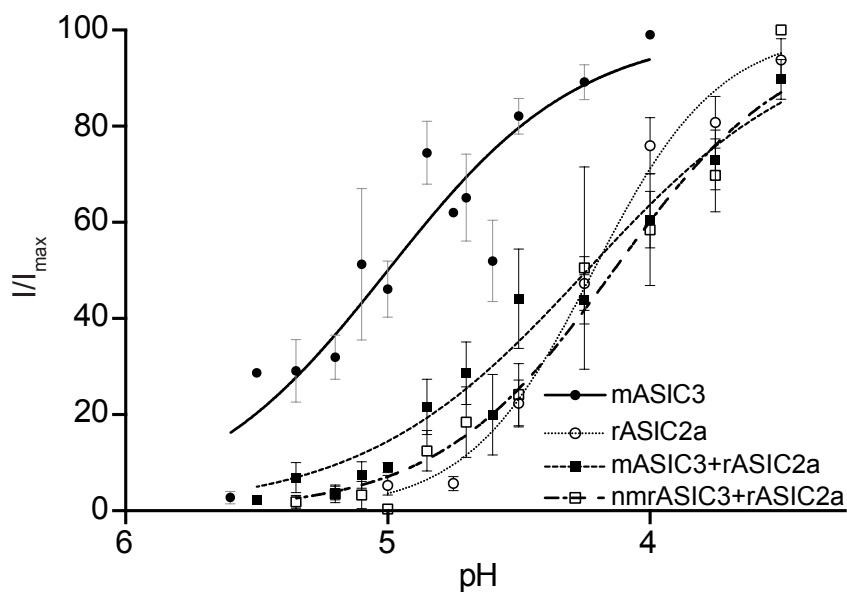



# Figure 5

**A**

bioRxiv preprint doi: <https://doi.org/10.1101/166272>; this version posted July 21, 2017. The copyright holder for this preprint (which was not certified by peer review) is the author/funder, who has granted bioRxiv a license to display the preprint in perpetuity. It is made available under aCC-BY-ND 4.0 International license.

|                       | 100                 | 60                            | 100                           | 110 |
|-----------------------|---------------------|-------------------------------|-------------------------------|-----|
| Mouse                 | MK P P S G L E E A  | A A F L Y Q V A E R V R Y Y G | R R S R L T P N D L H W A G T |     |
| Rat                   | MK P R S G L E E A  | A A F L Y Q V A E R V R Y Y G | R R S R L T P N D L H W A G T |     |
| Blind mole-rat        | MK P P S G L E E A  | A A F L Y Q V A E R V R Y Y G | R R S R L T P N D L H W A G M |     |
| <b>Naked mole-rat</b> | - K S P S G M E E A | A A F L Y Q V E E R V R Y Y G | R R S H L T P N D L H W A G P |     |
| Guinea pig            | MK G P S G L E E A  | A A F I Y Q V A E R V Q Y Y G | R R S R L T P N D L H W A G P |     |
| Damaraland mole-rat   | MK S P S G Q E E A  | A A F L Y Q V A E R V R Y Y G | R R S H L T P N D L H W A G P |     |
| Rabbit                | MK R P S E Q E E A  | A A F L Y Q V A E R V R Y Y G | R R S R L T P N D L H W A G P |     |
| Large flying fox      | MK P L S G A E E A  | A A F L Y Q V A E R V R Y Y G | R R S R L T P N D L H W A G P |     |
| Little brown bat      | MK P P S G P E E A  | A A F L Y Q V A E R V R Y Y G | R R S R L T P N D L H W A G P |     |
| Human                 | MK P T S G P E E A  | A T F L Y Q V A E R V R Y Y R | R R S R L T P N D L H W A G S |     |

**D**

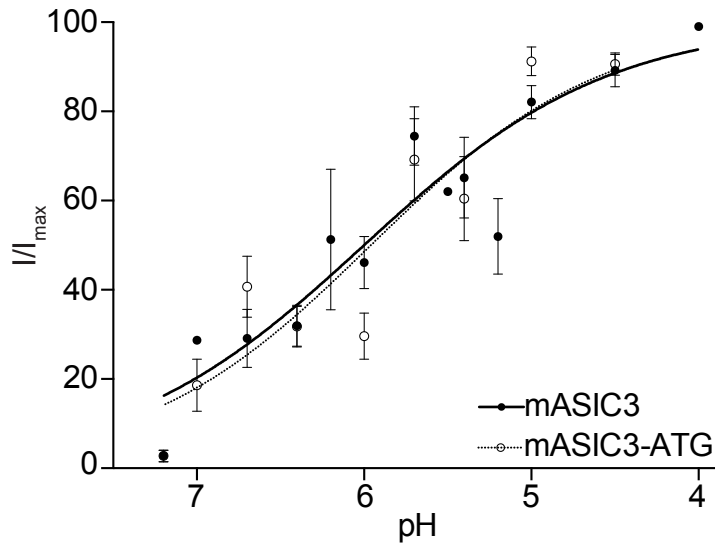

**E**

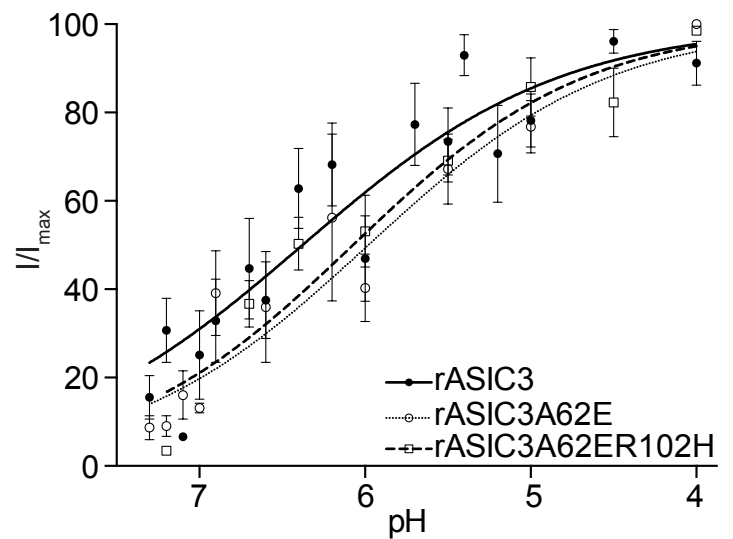

Source: http://www.biorxiv.org/content/10.1101/166272v1.full.pdf
